# Impacts of regional climate on the COVID-19 pandemic in 116 countries and territories

Authors: Minneng Wen, Liyuan Chen<sup>1\*</sup>

## Affiliations:

5 <sup>1</sup>School of Chemical Biology & Biotechnology, Peking University Shenzhen Graduate School, Nanshan, Shenzhen 518055, China.

\*Correspondence to: [chenliyuan@pku.edu.cn](mailto:chenliyuan@pku.edu.cn)

**Key words:** COVID-19; climate; sunshine UV; temperature, humidity, rainfall

## Abstract:

10 The COVID-19 pandemic has led to six million confirmed cases by May 31, 2020. We combined the number of monthly confirmed new cases and death with month, latitude, temperature, humidity, rainfall, and sunshine ultraviolet (UV) to explore the climate impact on epidemics in 116 countries and territories. The case-fatality rate sharply declined from April (8.06%) to May (4.94%). Humid subtropical climate regions had the most confirmed COVID-19 cases (24.4%).

15 The fatality in temperate marine regions was the highest (11.6%). Case-weighted means of absolute latitude, monthly average maximum temperature, relative humidity, rainfall, and sunshine UV were 36.7 degrees, 20.5°C, 63%, 63mm, and 53.5, respectively. Monthly confirmed cases increase as the temperature, rainfall, and sunshine UV rise in cold region-months ( $r=0.34$ , 0.26, 0.26, respectively), but no correlation in hot region-months. The fatality was 7.44% in cold

20 region-months ( $<20^{\circ}\text{C}$ ) but only 4.68% in hot region-months ( $\geq 20^{\circ}\text{C}$ ). Every 1°C increase in monthly maximum temperature leads to an increase in the natural logarithm of monthly confirmed new cases by 2.4% in cold region-months. Monthly confirmed cases increase as the temperature, rainfall, and sunshine UV rise in arid region-months ( $r=0.29$ , 0.28, 0.26, respectively), but no correlation in humid region-months ( $\geq 60\%$ ). Monthly confirmed cases

25 decrease as the relative humidity rise in humid region-months ( $r= -0.20$ ), but no correlation in arid region-months ( $<60\%$ ). The fatality was 7.14% in rainy region-months ( $\geq 40\text{mm/month}$ ) but only 3.86% in rainless region-months ( $<40\text{mm/month}$ ). Monthly confirmed new cases increase as the temperature and sunshine UV rise in rainy region-months ( $r=0.30$ , 0.29), but no correlation in rainless region-months. The fatality was 7.40% in cloudy region-months

30 (UV $<50/\text{day}$ ) but only 4.64% in sunny region-months (UV $\geq 50/\text{day}$ ). Monthly confirmed new deaths increase as the temperature and sunshine UV rise in cloudy region-months ( $r=0.30$ , 0.30), but no correlation in sunny region-months. It is wise to escape from an epicenter full of miasma to a hot sunny place in dry season without pollution. As peaking in the spring depends on the climate, the peak will go in the summer.

## Introduction

The COVID-19 pandemic emerged in Wuhan in December 2019 and has led to 6000000 confirmed cases and 367000 death by May 31, 2020.<sup>1</sup> The overall case fatality rate is 6.2%. Impacts of regional weather and climate on the pandemic have been investigated widely. For example, one study revealed that daily temperature, humidity, wind speed, and UV index were associated with a lower incidence of COVID-19 by March 12.<sup>2</sup> UV light was strongly associated with lower COVID-19 growth rates in the early phase before intervention.<sup>3</sup> The temperature and humidity could explain 18% of the variation in case doubling time in China by March 1.<sup>4</sup> Every 1 °C increase in temperature was associated with a 3.08% reduction in daily new cases and a 1.19% reduction in daily new deaths in 166 countries by March 27.<sup>5</sup> The doubling time of COVID-19 transmission increase by 40-50% when the temperature rise from 5 °C to 25 °C by April 14.<sup>6</sup> The growth rate was affected by precipitation seasonality and warming velocity rather than temperature by April 6.<sup>7</sup> A one-degree increase in absolute latitude is associated with a 2.6% increase in cases per million inhabitants.<sup>8</sup>

Experimental studies revealed that novel coronavirus could not be quickly destroyed by hot temperature but UV radiation in the summer. Ninety percent of infectious SARS-COV-2 virus was inactivated every 6.8 minutes in simulated saliva and every 14.3 minutes in culture media when exposed to simulated sunlight.<sup>9</sup> However, UV light may be meaningless for inactivating viruses in areas with high air pollution where UV light turns into heat.<sup>10</sup> COVID-19 exploded during the darkest January in Wuhan in over a decade, as daily irradiance correlated with case growth seven days later.<sup>11</sup> The humid subtropical climate and serious pollution in Wuhan could partly explain why the case-fatality rate was up to 6.6% in Wuhan but only 0.8% in other regions of China.

## Methods

We investigated the climate impacts on the COVID-19 pandemic in 116 countries and territories with more than 1000 cumulative number of confirmed cases from December 2019 to May 2020 (table).

|                 |                         | <b>Confirmed cases</b> | <b>Deaths</b> | <b>Case-fatality rate</b> |
|-----------------|-------------------------|------------------------|---------------|---------------------------|
| China*          | 29 provinces and cities | 84374                  | 4642          | 5.5%                      |
| United States   | 50 states and DC        | 1793753                | 104231        | 5.8%                      |
| Other countries | 110 countries           | 4100689                | 260209        | 6.3%                      |
| Territories     | 4 territories           | 7727                   | 193           | 0.17%                     |
| Total           | 194 regions             | 5986543                | 369275        | 6.2%                      |

**Table. Confirmed COVID-19 cases and deaths in 116 countries and territories.** \*China includes Hong Kong, Macao, and Taiwan.

We obtained province-level case data from the National Health Commission of China and its provincial branches.<sup>12</sup> There are 29 provinces and cities with more than 100 confirmed cases in China. US state-level data is from The New York Times, based on reports from state and local health agencies.<sup>13</sup> All 50 states and Washington DC had more than 100 confirmed cases. We collected case data of each month from 194 epidemic regions across 116 countries and territories. The number of monthly new cases and deaths were transformed by natural logarithm before analyses. These 194 regions are distributed in 12 climate regions based on Köppen climate classification: Tropical rainforest, tropical grasslands, tropical monsoon, tropical desert, humid subtropical, Mediterranean climate, subtropical highland, subtropical desert, humid continental, temperate marine, temperate grasslands, temperate desert, subarctic.

We extracted latitude data from the Google map and climate data from Weather-atlas.<sup>14</sup> We did not use the minimum temperature data but the maximum temperature in terms of collinearity. We calculated the means of absolute latitude, monthly maximum temperature, relative humidity, rainfall, and sunshine UV weighted by the number of monthly confirmed new cases. We created a new climate indicator, sunshine UV, the product of average sunshine time times average UV index. For example, the average sunshine is 7.5 hours per day and the average UV index is 6 in April, so the average sunshine UV is 45.

Correlation and nonlinear regression analyses were performed with Stata software to estimate the impacts of the climate on the number of monthly confirmed new cases and deaths. In order to evaluate the impacts of climate, all epidemic region-months were divided into two temperature-groups, two humidity-groups, two rain-groups, and two UV-groups: hot and cold region-months ( $\geq 20$  °C,  $< 20$  °C), humid and arid region-months ( $\geq 60\%$ ,  $< 60\%$ ), rainy regions and rainless region-months ( $\geq 40$ mm/month,  $< 40$ mm/month), sunny and cloudy region-months ( $\geq 50$ /day,  $< 50$ /day).

## Results

A total of 194 epidemic regions contributed 689 region-months in a mean follow-up of 3.55 months from December 2019 to May 2020. The pandemic reached its summit with 2800000 new cases in May. The case-fatality rate sharply declined from April (8.06%) to May (4.94%). The seasonal pattern is inverted between the northern and southern hemispheres. Figure 1 shows monthly confirmed new cases and deaths of the COVID-19 pandemic in the northern and southern hemispheres.

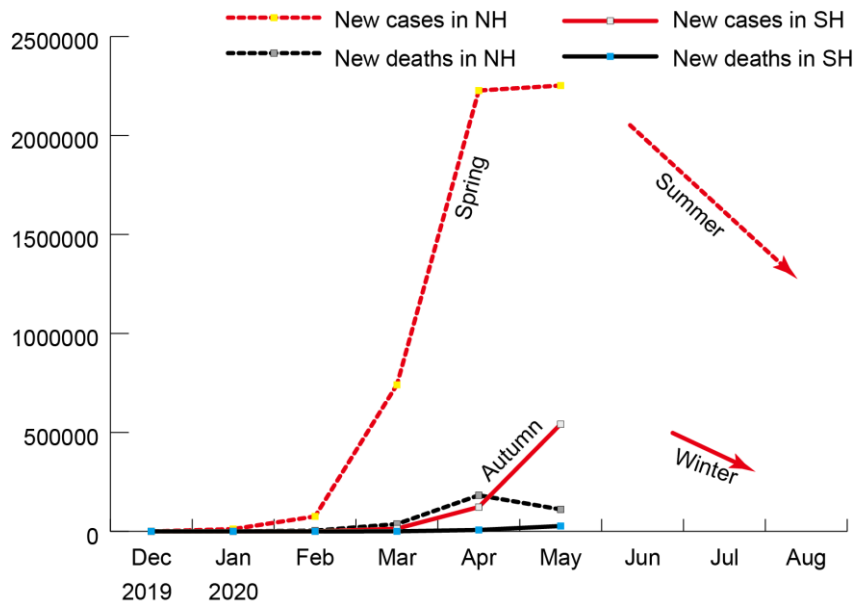

**Figure 1. Monthly confirmed new cases and deaths in the northern hemisphere (NH) and southern hemisphere (SH).**

Figure 2 shows the total number of confirmed cases and deaths of the COVID-19 pandemic in 12 climate regions. Four humid climate types had 73% of total confirmed cases and 83% of total deaths: humid subtropical, Mediterranean climate, humid continental, and temperate marine regions. Including New York, humid subtropical climate regions had the most confirmed COVID-19 cases (24.4%) in all types of climate regions. The case-fatality rate in the United Kingdom and other temperate marine climate regions was the highest (11.6%). The case-fatality rate in tropical regions is only 3.60%, far lower than subtropical regions (6.86%) and temperate regions (6.67%).

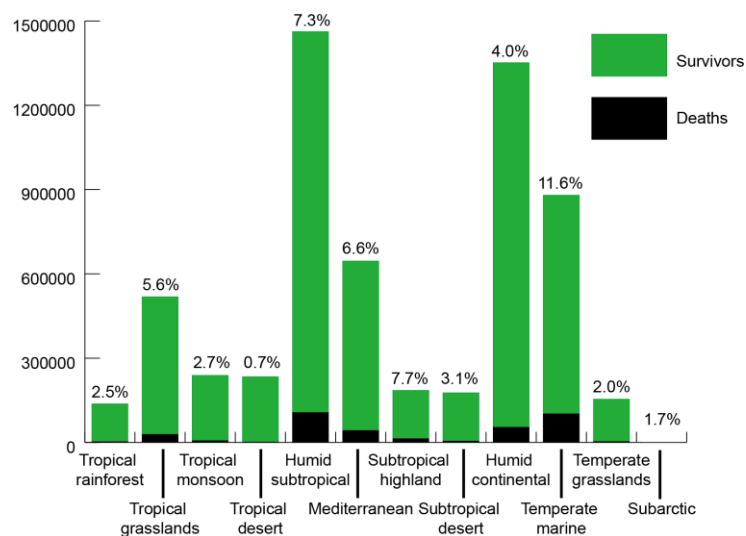

**Figure 2. The COVID-19 pandemic in different climate regions.** The number of confirmed cases includes survivors (red bars) and deaths (black bars).

Figure 3 shows monthly climate data of those center cities of all COVID-19 epidemic regions. The means of absolute latitude, monthly maximum temperature, relative humidity, rainfall, and sunshine UV weighted by the number of monthly confirmed new cases are 36.7 degrees, 20.5 °C, 63%, 63mm, and 53.5, respectively.

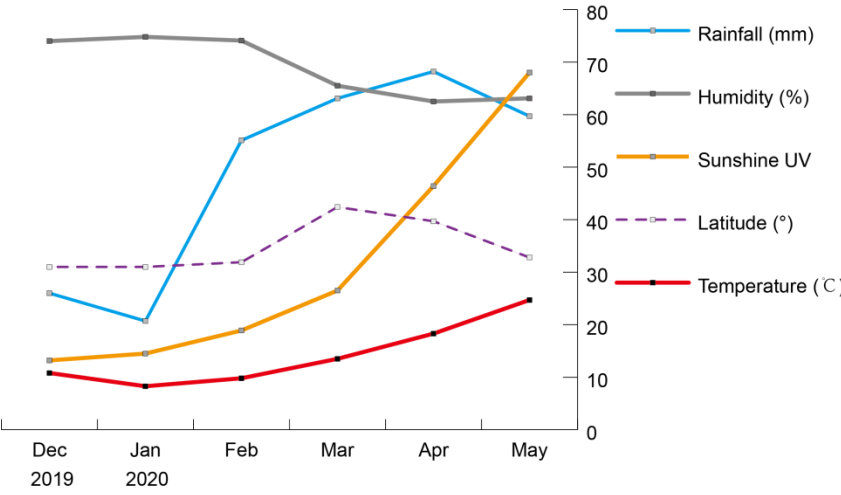

5

**Figure 3: Case-weighted means of climate data in COVID-19 epidemic regions.** Five climate indicators are absolute latitude, maximum temperature, relative humidity, rainfall, and sunshine UV.

Absolute latitude was weakly correlated to the natural logarithm of monthly confirmed new deaths in all region-months ( $r=0.23$ ). The number of confirmed cases in hot region-months ( $\geq 20^\circ\text{C}$ ) was 46% of the total. The case-fatality rate was 7.44% in cold region-months ( $< 20^\circ\text{C}$ ) but only 4.68% in hot region-months. Monthly confirmed cases increase as the temperature, rainfall, and sunshine UV rise in cold region-months ( $r=0.34, 0.26, 0.26$ , respectively), but no correlation in hot region-months.

A nonlinear regression analysis was performed to model the relationship between the number of monthly confirmed new cases ( $y$ ) and monthly maximum temperature ( $x$ ) in cold region-months. The R-squared of this model is 0.87,  $p < 0.0001$ . This regression model predicts that every  $1^\circ\text{C}$  increase in monthly maximum temperature leads to an increase in the natural logarithm of monthly confirmed new cases by 2.4% in cold region-months. The model is as follows,

20

$$\ln(y) = 4.86325 \times 1.024^x$$

The number of confirmed cases in humid region-months ( $\geq 60\%$ ) was 70% of the total. Monthly confirmed cases increase as the temperature, rainfall, and sunshine UV rise in arid region-months ( $r=0.29, 0.28, 0.26$ , respectively), but no correlation in humid region-months. Monthly confirmed cases decrease as the relative humidity rises in humid region-months ( $r = -0.21$ ) but no correlation in arid region-months.

25

The number of confirmed cases in rainy region-months ( $\geq 40\text{mm/month}$ ) was 70% of the total. The case-fatality rate was 7.14% in rainy region-months but only 3.86% in rainless region-months ( $< 40\text{mm/month}$ ). Monthly confirmed new cases increase as the temperature and sunshine UV rise in rainy region-months ( $r=0.30, 0.29$ ), but no correlation in rainless region-months. Monthly confirmed new cases decrease as the relative humidity rise in rainy region-months ( $r= -0.26$ ) but no correlation in rainless region-months.

The case-fatality rate was 7.40% in cloudy region-months ( $UV < 50/\text{day}$ ) but only 4.64% in sunny region-months ( $UV \geq 50/\text{day}$ ). Monthly confirmed new deaths increase as the temperature and sunshine UV rise in cloudy region-months ( $r=0.30, 0.30$ ), but no correlation in sunny region-months. The case-fatality rate was 7.57% in cold humid region-months but only 3.87% in hot arid region-months. The case-fatality rate was 7.97% in cold humid rainy region-months but only 2.67% in hot arid region-months.

## Discussion

We found that the impacts of temperature, humidity, rainfall, and sunshine UV on the COVID-19 pandemic were consistent with several previous studies. Both SARS and COVID-19 emerged in the winter. SARS peaked in the spring and was gone in the summer of 2003. COVID-19 is considered to be the updated version of SARS, so the peak of COVID-19 will possibly show a downward trend with less cases and lower case-fatality rates in the northern hemisphere in the coming summer and also a downward trend with less cases but higher case-fatality rates in the southern hemisphere in the coming winter.

Aerosol transmission of the virus by water microdroplets and pollution particles as carriers is plausible since the virus can remain viable and infectious in aerosols for hours and the UV radiation can destroy the virus in minutes. Many epicenters are humid and cloudy with air pollution and all kinds of viruses, forming so-called miasma. As the case-fatality rate was 12% in Northern Italy but only 4.5% in the rest of the country by March 21, 2020, researchers found a correlation between the high level of COVID-19 lethality and the atmospheric pollution in Northern Italy.<sup>15</sup> An increase of only  $1 \mu\text{g}/\text{m}^3$  in PM<sub>2.5</sub> is associated with an 8% increase in the COVID-19 death rate in the United States up to April 22, 2020.<sup>16</sup>

It is wise to escape from an epicenter full of miasma to a hot sunny place with clean air. On the contrary, extremely locking down an epicenter to prevent escape is not the best policy. Wearing masks is necessary for epidemic prevention, especially in an epicenter full of miasma. Authorities should control air pollution, increasing fossil energy taxes to promote clean energy. UV lamps, air heaters, and oxygen bottles are necessary to improve the air quality in ICU and isolating rooms for patients. We suggest UV lamps should be compulsory in all service spaces, including classrooms, dormitories, hospitals, hotels, bars, restaurants, offices, warehouses, and

public transport.

Why SARS disappeared in 2003 but MERS has continued until now? SARS virus was occasionally from the civet cat to mankind but the MERS virus was continuously from camels. The animal-human interspecies transmission of the COVID-19 virus is likely another occasional event. Additionally, the infectivity, virulence, and lethality of any virus is certain to decline after several months of reproduction. The discovery of this principle led to the development of the first vaccine in the history of mankind: A doctor in Sichuan, China, inoculated against smallpox in the tenth century.<sup>18</sup> We suppose a new pandemic of a new virus from interspecies jumping is more possible than another COVID-19 pandemic.

10

### **Contributors**

MW proposed the project and wrote the paper. LC supported the project and revised the paper.

### **Declarations of interest**

We declare no competing interests.

### **15 Acknowledgments**

We thank Deepak Gupta and Jessica Carr helpful feedback.

### **Data and materials availability**

All data needed to evaluate the conclusion in the paper are present in the paper or the supplementary materials.

20

### **References:**

- 1 WHO. Coronavirus disease (COVID-2019) situation reports. **132**. 2020 May 31.
- 2 Islam N, Shabnam S, Erzurumluoglu AM. Temperature, humidity, and wind speed are associated with lower Covid-19 incidence. *medRxiv*. 2020 Mar 27: 20045658.
- 25 3 Merow C, Urban MC. Seasonality and uncertainty in COVID-19 growth rates. *medRxiv*. 2020 Apr 19: 20071951.
- 4 Oliveiros B, Caramelo L, Ferreira NC, Caramelo F, Role of temperature and humidity in the modulation of the doubling time of COVID-19 cases. *MedRxiv*. 2020 Mar 5: 20031872
- 5 Wu Y, Jing W, Liu J, Ma Q, Yuan J, Wang Y, Du M, Liu M. Effects of temperature and humidity on the daily new cases and new deaths of COVID-19 in 166 countries. *Sci total environ*. 2020 Apr 28:139051.
- 30 6 Notari A. Temperature dependence of COVID-19 transmission. *arXiv*. 2020 Mar 27:

2003.12417.

- 7 Chiyomaru K, Takemoto K. Global COVID-19 transmission rate is influenced by precipitation seasonality and the speed of climate temperature warming. *medRxiv*. 2020 Apr 1: 20060459.
- 5 8 Chen S, Prettner K, Kuhn M, et al. COVID-19 and climate: global evidence from 117 countries. *medRxiv*. 2020 June 4: 20121863.
- 9 Ratnesar-Shumate S, Williams G, Green B, et al. Simulated sunlight rapidly inactivates SARS-CoV-2 on surfaces. *The Journal of Infectious Diseases*. 2020; jiaa274.
- 10 Yudistira N, Sumitro SB, Nahas A, Riama NF. UV light influences covid-19 activity through big data: trade offs between northern subtropical, tropical, and southern subtropical countries. *medRxiv*. 2020 April 30: 20086983.
- 11 B äcker A. Follow the sun: slower COVID-19 morbidity and mortality growth at higher irradiances. SSRN. 2020 April 2: 3567587.
- 12 National Health Commission of China. <http://www.nhc.gov.cn>. 2020 May 31.
- 15 13 The New York Times. Coronavirus (Covid-19) Data in the United States. <https://github.com/nytimes/covid-19-data>. 2020 May 31.
- 14 Yu Media Group. [Weather-atlas.com](http://weather-atlas.com). 2020 May .
- 15 Conticini E, Frediani B, Caro D. Can atmospheric pollution be considered a co-factor in extremely high level of SARS-CoV-2 lethality in Northern Italy? *Environmental Pollution*. 2020 Apr 4:114465.
- 20 16 Wu X, Nethery RC, Sabath BM, Braun D, Dominici F. Exposure to air pollution and COVID-19 mortality in the United States. *medRxiv*. 2020 Apr 5: 20054502.
- 17 Zhu CG. Final conclusion on pox. 1713.

25 **Supplementary Materials:**

Figure S1-S3

Tables S1-S4

External databases S1
